# Supplementary material for: The Impact of Race, Ethnicity, and Sex on Fairness in Artificial Intelligence for Glaucoma Prediction Models
Source: PubMed Central journal article supplement — Ophthalmol Sci. 2024 Aug 14;5(1):100596. doi: 10.1016/j.xops.2024.100596 (PMC11462200; doi:10.1016/j.xops.2024.100596), 2024-08-14
Supplement: mmc1.pdf [file mmc1.pdf]

## Example Timelines For Patients Who Did Not Undergo Surgery

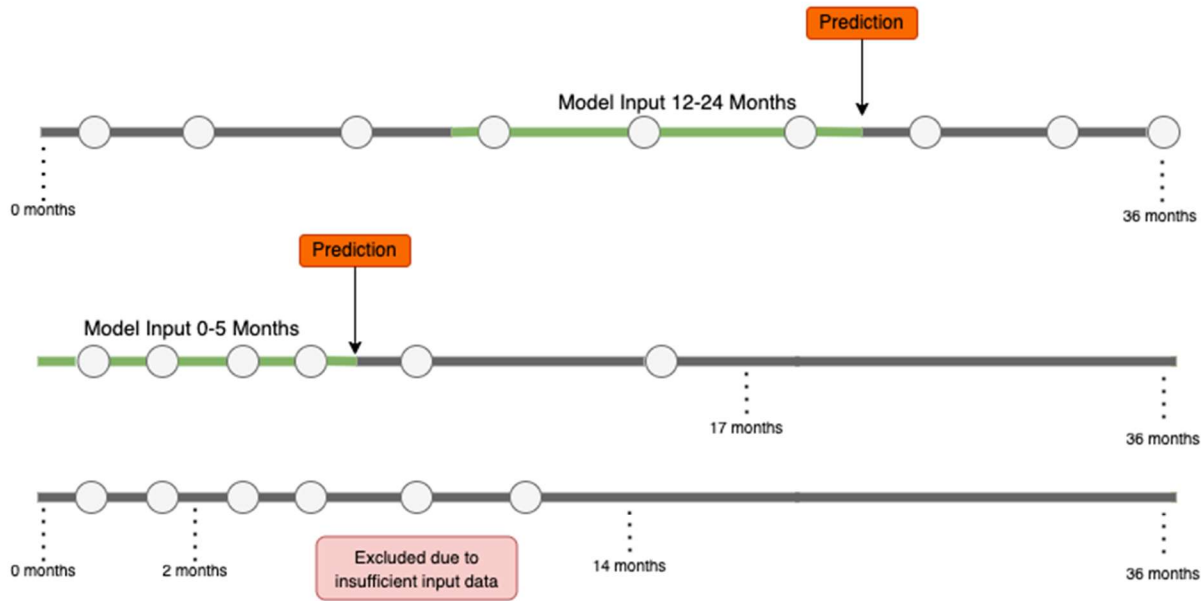

## Example Timelines For Surgery Patients

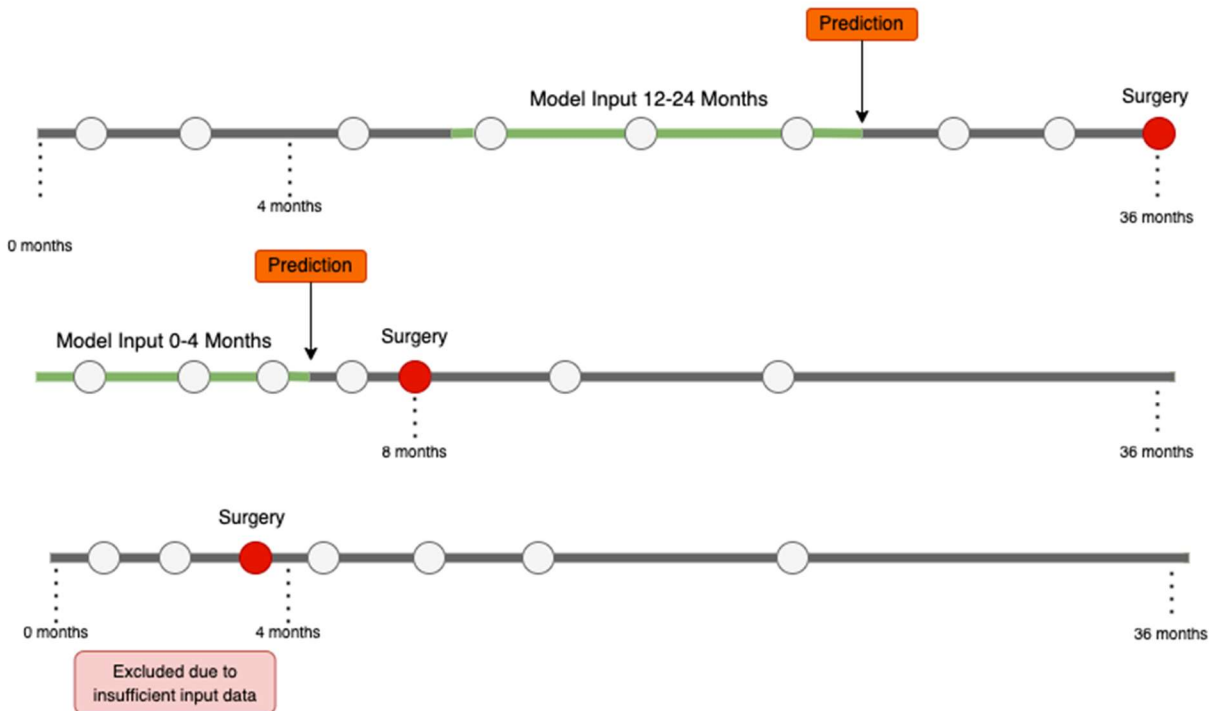

**Figure S1. Example Timelines for Surgery Patients**

**Legend:** This figure depicts example timelines of patients who did and did not progress to glaucoma surgery. Orange circles represent surgery dates. White circles represent other encounters with associated clinical data in the electronic health record. The timelines depict the prediction date for different types of patients and the time frame of input data from the electronic health record.
