# Supplementary material for: The Impact of Race, Ethnicity, and Sex on Fairness in Artificial Intelligence for Glaucoma Prediction Models
Source: PubMed Central journal article supplement — Ophthalmol Sci. 2024 Aug 14;5(1):100596. doi: 10.1016/j.xops.2024.100596 (PMC11462200; doi:10.1016/j.xops.2024.100596), 2024-08-14
Supplement: mmc2.pdf [file mmc2.pdf]

**Table S1. Codes for Cohort Building**

| Inclusion Codes                                                         |                                                                                                                                                                                              |
|-------------------------------------------------------------------------|----------------------------------------------------------------------------------------------------------------------------------------------------------------------------------------------|
| CPT Codes for Glaucoma Surgery                                          | 0191T, 04747T, 66989, 66991, 0253T, 66170, 66172, 66179, 0192T, 66174, 66175, 66710, 66711, 66987, 66988, 66720, 66740, 66155, 66160, 65820, 66183, 67250, 67255, 66184, 66185, 67120, 67121 |
| ICD Codes for Glaucoma (codes do not include suspects or hypertensives) | 356.1x, 356.2x, 356.3x, 356.4x, 356.5x, 356.6x, 356.7x, 356.8x, 356.9x, H42, Q15.0                                                                                                           |
