# Supplementary material for: The Impact of Race, Ethnicity, and Sex on Fairness in Artificial Intelligence for Glaucoma Prediction Models
Source: PubMed Central journal article supplement — Ophthalmol Sci. 2024 Aug 14;5(1):100596. doi: 10.1016/j.xops.2024.100596 (PMC11462200; doi:10.1016/j.xops.2024.100596), 2024-08-14
Supplement: mmc3.pdf [file mmc3.pdf]

Table S2. Fairness Metrics

| <u>Metric Name</u>                | <u>General Definition</u>                                                                                                                                                                                | <u>Example Statement</u>                                                                                                                                                                                                                        | <u>Equality Statement</u>                                                                                                                          | <u>Formula</u>                                                                                  |
|-----------------------------------|----------------------------------------------------------------------------------------------------------------------------------------------------------------------------------------------------------|-------------------------------------------------------------------------------------------------------------------------------------------------------------------------------------------------------------------------------------------------|----------------------------------------------------------------------------------------------------------------------------------------------------|-------------------------------------------------------------------------------------------------|
| Independence (Demographic Parity) | A classifier (M) satisfies the independence fairness criterion, if its output ( $\hat{Y}$ ) is independent of the sensitive attributes $A$ .                                                             | The model's prediction of whether a glaucoma patient will progress to surgery is independent of that patient's sensitive characteristics; the proportion of those in the positive predicted class is the same across sensitive characteristics. | $P\{\hat{Y} = 1   A = a_1\} = P\{\hat{Y} = 1   A = a_2\}$                                                                                          | $ \text{Support}(M, G1) - \text{Support}(M, G2) $                                               |
| Equalized Odds                    | A classifier (M) satisfies the equalized odds definition of fairness, if its output ( $\hat{Y}$ ) is conditionally (with respect to the target output $Y$ ) independent of the sensitive attribute $A$ . | The model's prediction of whether a glaucoma patient will progress to surgery performs with equal false positive and true positive rates for White and nonWhite patients.                                                                       | $P\{\hat{Y} = 1   Y = 1, A = a_1\} = P\{\hat{Y} = 1   Y = 1, A = a_2\}$<br>$P\{\hat{Y} = 1   Y = 0, A = a_1\} = P\{\hat{Y} = 1   Y = 0, A = a_2\}$ | $ \text{Recall}(M, G1) - \text{Recall}(M, G2)  +  \text{FPR}(M, G1) - \text{FPR}(M, G2) $       |
| Overall Accuracy Equality         | A classifier (M) satisfies the overall accuracy equality, if a learning system's accuracy values for both groups are equal.                                                                              | The model's prediction of whether a glaucoma patient will progress to surgery is equally accurate for White and Non-White patients                                                                                                              | $P\{\hat{Y} = Y   A = a_1\} = P\{\hat{Y} = Y   A = a_2\}$                                                                                          | $ \text{Accuracy}(M, G1) - \text{Accuracy}(M, G2) $                                             |
| Sufficiency (Calibration)         | A classifier (M) satisfies the sufficiency condition if the target output $Y$ is conditionally (with respect to $\hat{Y}$ ) independent of the sensitive attribute $A$ .                                 | For any given predicted probability score, the actual probability of whether a glaucoma patient will progress to surgery should be equal for both White and Non-White patients.                                                                 | $P\{Y = 1   \hat{Y} = \hat{y}, A = a_1\} = P\{Y = 1   \hat{Y} = \hat{y}, A = a_2\}$                                                                | $ \text{Precision}(M, G1) - \text{Precision}(M, G2)  +  \text{FOR}(M, G1) - \text{FOR}(M, G2) $ |

Let  $A_1, \dots, A_M$  be the sensitive attributes and  $X_1, \dots, X_m$  be the other (insensitive attributes).  $Y$  is the target (desired) output and  $\hat{Y}$  is the classifier output. Furthermore, assume  $A$  has two possible values  $a_1$  and  $a_2$ . Finally, we define  $A = a_1$  as G1 and  $A = a_2$  as G2.
