# Supplementary material for: The Impact of Race, Ethnicity, and Sex on Fairness in Artificial Intelligence for Glaucoma Prediction Models
Source: PubMed Central journal article supplement — Ophthalmol Sci. 2024 Aug 14;5(1):100596. doi: 10.1016/j.xops.2024.100596 (PMC11462200; doi:10.1016/j.xops.2024.100596), 2024-08-14
Supplement: mmc4.pdf [file mmc4.pdf]

**Table S4a. Performance Metrics**

| Models                              |          | AUC                     |                            |                              | ACC           |                  |                  | Precision     |                  |                  | Recall        |                  |                  |
|-------------------------------------|----------|-------------------------|----------------------------|------------------------------|---------------|------------------|------------------|---------------|------------------|------------------|---------------|------------------|------------------|
|                                     |          | Internal Test w/ 95% CI | External Test #1 w/ 95% CI | External 2 Test #2 w/ 95% CI | Internal Test | External Test #1 | External Test #2 | Internal Test | External Test #1 | External Test #2 | Internal Test | External Test #1 | External Test #2 |
| <b>Sex</b>                          |          |                         |                            |                              |               |                  |                  |               |                  |                  |               |                  |                  |
| Not Using Sensitive Attributes (M1) |          |                         |                            |                              |               |                  |                  |               |                  |                  |               |                  |                  |
|                                     | Male     | 0.779 (0.779 – 0.780)   | 0.724 (0.722 – 0.726)      | 0.676 (0.676 – 0.677)        | 0.797         | 0.742            | 0.507            | 0.419         | 0.363            | 0.359            | 0.534         | 0.570            | 0.859            |
|                                     | Female   | 0.768 (0.766 – 0.769)   | 0.763 (0.761 – 0.764)      | 0.666 (0.664 – 0.666)        | 0.712         | 0.788            | 0.570            | 0.333         | 0.384            | 0.312            | 0.676         | 0.537            | 0.711            |
| Using Sensitive Attributes (M2)     |          |                         |                            |                              |               |                  |                  |               |                  |                  |               |                  |                  |
|                                     | Male     | 0.778 (0.777 – 0.778)   | 0.731 (0.730 – 0.734)      | 0.681 (0.679 – 0.682)        | 0.790         | 0.751            | 0.618            | 0.409         | 0.370            | 0.410            | 0.563         | 0.535            | 0.678            |
|                                     | Female   | 0.765 (0.764 – 0.766)   | 0.764 (0.764 – 0.765)      | 0.674 (0.671 – 0.676)        | 0.759         | 0.658            | 0.617            | 0.370         | 0.294            | 0.334            | 0.581         | 0.797            | 0.657            |
| Separate Models for Each Group (M3) |          |                         |                            |                              |               |                  |                  |               |                  |                  |               |                  |                  |
|                                     | Male     | 0.77 (0.768 – 0.771)    | 0.713 (0.711 – 0.716)      | 0.675 (0.673 – 0.675)        | 0.778         | 0.634            | 0.564            | 0.388         | 0.289            | 0.38             | 0.552         | 0.702            | 0.761            |
|                                     | Female   | 0.765 (0.764 – 0.766)   | 0.755 (0.752 – 0.756)      | 0.67 (0.667 – 0.671)         | 0.672         | 0.806            | 0.675            | 0.31          | 0.41             | 0.362            | 0.743         | 0.459            | 0.53             |
| <b>Race</b>                         |          |                         |                            |                              |               |                  |                  |               |                  |                  |               |                  |                  |
| Not Using Sensitive Attributes (M1) |          |                         |                            |                              |               |                  |                  |               |                  |                  |               |                  |                  |
|                                     | White    | 0.776 (0.775 – 0.776)   | 0.750 (0.749-0.750)        | 0.675 (0.674 – 0.675)        | 0.813         | 0.695            | 0.611            | 0.420         | 0.301            | 0.349            | 0.494         | 0.718            | 0.676            |
|                                     | NonWhite | 0.762 (0.762-0.764)     | 0.747 (0.746-0.748)        | 0.666 (0.666 – 0.667)        | 0.711         | 0.762            | 0.629            | 0.364         | 0.371            | 0.388            | 0.667         | 0.556            | 0.614            |
| Using Sensitive Attributes (M2)     |          |                         |                            |                              |               |                  |                  |               |                  |                  |               |                  |                  |
|                                     | White    | 0.774 (0.773-0.774)     | 0.751 (0.751-0.752)        | 0.676 (0.676 – 0.678)        | 0.788         | 0.703            | 0.637            | 0.384         | 0.312            | 0.365            | 0.564         | 0.744            | 0.648            |
|                                     | NonWhite | 0.761 (0.760-0.761)     | 0.750 (0.749 – 0.751)      | 0.676 (0.674-0.677)          | 0.711         | 0.762            | 0.639            | 0.364         | 0.366            | 0.398            | 0.671         | 0.529            | 0.614            |
| Separate Models for Each Group (M3) |          |                         |                            |                              |               |                  |                  |               |                  |                  |               |                  |                  |
|                                     | White    | 0.766 (0.765-0.766)     | 0.755 (0.754-0.756)        | 0.665 (0.664-0.666)          | 0.761         | 0.799            | 0.584            | 0.352         | 0.362            | 0.336            | 0.612         | 0.538            | 0.711            |

|                                     |             |                       |                      |                     |       |       |       |       |       |       |       |       |       |
|-------------------------------------|-------------|-----------------------|----------------------|---------------------|-------|-------|-------|-------|-------|-------|-------|-------|-------|
|                                     | NonWhite    | 0.738 (0.387-0.739)   | 0.733 (0.731-0.733)  | 0.681 (0.680-0.682) | 0.679 | 0.607 | 0.577 | 0.333 | 0.274 | 0.368 | 0.662 | 0.785 | 0.758 |
| <b>Ethnicity</b>                    |             |                       |                      |                     |       |       |       |       |       |       |       |       |       |
| Not Using Sensitive Attributes (M1) |             |                       |                      |                     |       |       |       |       |       |       |       |       |       |
|                                     | NonHispanic | 0.770 (0.770-0.772)   | 0.747 (0.746-0.748)  | 0.666 (0.665-0.666) | 0.785 | 0.766 | 0.632 | 0.396 | 0.373 | 0.357 | 0.519 | 0.544 | 0.617 |
|                                     | Hispanic    | 0.821 (0.819-0.822)   | 0.808 (0.802- 0.809) | 0.689 (0.686-0.690) | 0.733 | 0.722 | 0.539 | 0.407 | 0.231 | 0.436 | 0.857 | 1.000 | 0.875 |
| Using Sensitive Attributes (M2)     |             |                       |                      |                     |       |       |       |       |       |       |       |       |       |
|                                     | NonHispanic | 0.769 (0.768-0.769)   | 0.751 (0.750-0.752)  | 0.667 (0.667-0.668) | 0.772 | 0.763 | 0.631 | 0.382 | 0.363 | 0.356 | 0.570 | 0.514 | 0.617 |
|                                     | Hispanic    | 0.814 (0.811 – 0.815) | 0.798 (0.797-0.799)  | 0.700 (0.698-0.701) | 0.719 | 0.750 | 0.542 | 0.390 | 0.250 | 0.441 | 0.821 | 1.000 | 0.938 |
| Separate Models for Each Group (M3) |             |                       |                      |                     |       |       |       |       |       |       |       |       |       |
|                                     | NonHispanic | 0.767 (0.766-0.767)   | 0.754 (0.752-0.754)  | 0.657 (0.656-0.658) | 0.776 | 0.762 | 0.58  | 0.384 | 0.37  | 0.332 | 0.538 | 0.559 | 0.693 |
|                                     | Hispanic    | 0.722 (0.720 – 0.723) | 0.556 (0.555-0.558)  | 0.677 (0.676-0.678) | 0.664 | 0.889 | 0.565 | 0.328 | 0.333 | 0.466 | 0.714 | 0.333 | 0.777 |
