# Supplementary material for: The Impact of Race, Ethnicity, and Sex on Fairness in Artificial Intelligence for Glaucoma Prediction Models
Source: PubMed Central journal article supplement — Ophthalmol Sci. 2024 Aug 14;5(1):100596. doi: 10.1016/j.xops.2024.100596 (PMC11462200; doi:10.1016/j.xops.2024.100596), 2024-08-14
Supplement: mmc5.pdf [file mmc5.pdf]

**Table S4b. Additional Performance Metrics**

| <u>Models</u>                       |          | <u>Support</u> |                  |                  | <u>FPR</u>    |                  |                  | <u>FOR</u>    |                  |                  |
|-------------------------------------|----------|----------------|------------------|------------------|---------------|------------------|------------------|---------------|------------------|------------------|
|                                     |          | Internal Test  | External Test #1 | External Test #2 | Internal Test | External Test #1 | External Test #2 | Internal Test | External Test #1 | External Test #2 |
| <b><u>Sex</u></b>                   |          |                |                  |                  |               |                  |                  |               |                  |                  |
| Not Using Sensitive Attributes (M1) |          |                |                  |                  |               |                  |                  |               |                  |                  |
|                                     | Male     | 0.214          | 0.284            | 0.703            | 0.149         | 0.221            | 0.638            | 0.1           | 0.108            | 0.14             |
|                                     | Female   | 0.348          | 0.221            | 0.528            | 0.281         | 0.162            | 0.473            | 0.085         | 0.098            | 0.142            |
| Using Sensitive Attributes (M2)     |          |                |                  |                  |               |                  |                  |               |                  |                  |
|                                     | Male     | 0.232          | 0.261            | 0.487            | 0.165         | 0.201            | 0.407            | 0.096         | 0.114            | 0.185            |
|                                     | Female   | 0.269          | 0.437            | 0.456            | 0.205         | 0.368            | 0.396            | 0.098         | 0.058            | 0.146            |
| Separate Models for Each Group (M3) |          |                |                  |                  |               |                  |                  |               |                  |                  |
|                                     | Male     | 0.239          | 0.439            | 0.59             | 0.176         | 0.381            | 0.519            | 0.099         | 0.096            | 0.171            |
|                                     | Female   | 0.412          | 0.181            | 0.399            | 0.343         | 0.127            | 0.282            | 0.075         | 0.106            | 0.165            |
| <b><u>Race</u></b>                  |          |                |                  |                  |               |                  |                  |               |                  |                  |
| Not Using Sensitive Attributes (M1) |          |                |                  |                  |               |                  |                  |               |                  |                  |
|                                     | White    | 0.186          | 0.373            | 0.475            | 0.128         | 0.31             | 0.41             | 0.098         | 0.071            | 0.151            |
|                                     | NonWhite | 0.353          | 0.257            | 0.434            | 0.278         | 0.195            | 0.365            | 0.099         | 0.102            | 0.187            |
| Using Sensitive Attributes (M2)     |          |                |                  |                  |               |                  |                  |               |                  |                  |
|                                     | White    | 0.232          | 0.373            | 0.436            | 0.17          | 0.305            | 0.367            | 0.09          | 0.064            | 0.153            |
|                                     | NonWhite | 0.355          | 0.248            | 0.423            | 0.28          | 0.189            | 0.351            | 0.098         | 0.107            | 0.183            |
| Separate Models for Each Group (M3) |          |                |                  |                  |               |                  |                  |               |                  |                  |
|                                     | White    | 0.274          | 0.233            | 0.52             | 0.211         | 0.176            | 0.458            | 0.084         | 0.094            | 0.148            |
|                                     | NonWhite | 0.384          | 0.49             | 0.565            | 0.317         | 0.429            | 0.492            | 0.106         | 0.072            | 0.152            |
| <b><u>Ethnicity</u></b>             |          |                |                  |                  |               |                  |                  |               |                  |                  |
| Not Using Sensitive Attributes (M1) |          |                |                  |                  |               |                  |                  |               |                  |                  |

|                                     |              |       |       |       |       |       |       |       |       |       |
|-------------------------------------|--------------|-------|-------|-------|-------|-------|-------|-------|-------|-------|
|                                     | Non_Hispanic | 0.222 | 0.25  | 0.426 | 0.161 | 0.189 | 0.363 | 0.105 | 0.104 | 0.164 |
|                                     | Hispanic     | 0.404 | 0.361 | 0.735 | 0.297 | 0.303 | 0.655 | 0.046 | 0     | 0.173 |
| Using Sensitive Attributes (M2)     |              |       |       |       |       |       |       |       |       |       |
|                                     | Non_Hispanic | 0.252 | 0.242 | 0.427 | 0.187 | 0.186 | 0.364 | 0.097 | 0.11  | 0.165 |
|                                     | Hispanic     | 0.404 | 0.333 | 0.778 | 0.305 | 0.273 | 0.686 | 0.057 | 0     | 0.103 |
| Separate Models for Each Group (M3) |              |       |       |       |       |       |       |       |       |       |
|                                     | Non_Hispanic | 0.237 | 0.257 | 0.515 | 0.176 | 0.195 | 0.457 | 0.102 | 0.102 | 0.156 |
|                                     | Hispanic     | 0.418 | 0.083 | 0.637 | 0.347 | 0.061 | 0.557 | 0.094 | 0.061 | 0.225 |
