# Supplementary material for: The Impact of Race, Ethnicity, and Sex on Fairness in Artificial Intelligence for Glaucoma Prediction Models
Source: PubMed Central journal article supplement — Ophthalmol Sci. 2024 Aug 14;5(1):100596. doi: 10.1016/j.xops.2024.100596 (PMC11462200; doi:10.1016/j.xops.2024.100596), 2024-08-14
Supplement: mmc6.pdf [file mmc6.pdf]

**Table S5. Fairness Metrics Performance**

| <u>Models</u> |                                     | <u>Equalized Odds</u> |                  |                  | <u>Independence</u> |                  |                  | <u>Overall Accuracy Equality</u> |                  |                  | <u>Sufficiency</u> |                  |                  |
|---------------|-------------------------------------|-----------------------|------------------|------------------|---------------------|------------------|------------------|----------------------------------|------------------|------------------|--------------------|------------------|------------------|
|               |                                     | Internal Test         | External Test #1 | External Test #2 | Internal Test       | External Test #1 | External Test #2 | Internal Test                    | External Test #1 | External Test #2 | Internal Test      | External Test #1 | External Test #2 |
| Sex           |                                     |                       |                  |                  |                     |                  |                  |                                  |                  |                  |                    |                  |                  |
|               | Not Using Sensitive Attributes (M1) | 0.273                 | 0.102            | 0.313            | 0.134               | 0.063            | 0.175            | 0.085                            | 0.046            | 0.062            | 0.101              | 0.032            | 0.05             |
|               | Using Sensitive Attributes (M2)     | 0.058                 | 0.429            | 0.033            | 0.038               | 0.176            | 0.031            | 0.031                            | 0.093            | 0.001            | 0.042              | 0.132            | 0.114            |
|               | Separate Models for Each Group (M3) | 0.358                 | 0.496            | 0.468            | 0.173               | 0.258            | 0.251            | 0.107                            | 0.172            | 0.111            | 0.103              | 0.131            | 0.024            |
| Race          |                                     |                       |                  |                  |                     |                  |                  |                                  |                  |                  |                    |                  |                  |
|               | Not Using Sensitive Attributes (M1) | 0.323                 | 0.277            | 0.106            | 0.167               | 0.117            | 0.042            | 0.101                            | 0.068            | 0.018            | 0.058              | 0.102            | 0.074            |
|               | Using Sensitive Attributes (M2)     | 0.217                 | 0.330            | 0.049            | 0.123               | 0.126            | 0.012            | 0.078                            | 0.060            | 0.002            | 0.029              | 0.098            | 0.063            |
|               | Separate Models for Each Group (M3) | 0.157                 | 0.500            | 0.082            | 0.110               | 0.257            | 0.045            | 0.082                            | 0.172            | 0.007            | 0.041              | 0.110            | 0.037            |
| Ethnicity     |                                     |                       |                  |                  |                     |                  |                  |                                  |                  |                  |                    |                  |                  |
|               | Not Using Sensitive Attributes (M1) | 0.474                 | 0.57             | 0.549            | 0.183               | 0.111            | 0.31             | 0.052                            | 0.043            | 0.093            | 0.07               | 0.246            | 0.087            |
|               | Using Sensitive Attributes (M2)     | 0.369                 | 0.574            | 0.642            | 0.152               | 0.092            | 0.351            | 0.052                            | 0.013            | 0.089            | 0.047              | 0.223            | 0.146            |
|               | Separate Models for Each Group (M3) | 0.348                 | 0.357            | 0.183            | 0.181               | 0.174            | 0.122            | 0.112                            | 0.127            | 0.015            | 0.065              | 0.078            | 0.184            |
